# Supplementary material for: Facile phase and composition tuned synthesis of tin chalcogenide nanocrystals
Source: Royal Society of Chemistry journal article supplement (doi:10.1039/c3ra40869h), 2013-01-01
Supplement: c3ra40869h.pdf [file c3ra40869h.pdf]

## Supplementary Information

### Facile Phase and Composition Tuned Synthesis of Tin Chalcogenide Nanocrystals

Hyung Soon Im, Yoon Myung, Yong Jae Cho, Chang Hyun Kim, Han Sung Kim, Seung Hyuk Back, Chan Su Jung, Dong Myung Jang, Young Rok Lim, Jeunghee Park, and Jae-Pyoung Ahn

Table S1. Experimental condition for the synthesis of NCs. (\*NA = not applicable)

|                                                      | Pressure (Torr)                   |                  |                                   | Annealing or reduction                        |
|------------------------------------------------------|-----------------------------------|------------------|-----------------------------------|-----------------------------------------------|
|                                                      | Sn(CH <sub>3</sub> ) <sub>4</sub> | H <sub>2</sub> S | Se(CH <sub>3</sub> ) <sub>2</sub> |                                               |
| Sn                                                   | 30                                | 0                | 0                                 | NA*                                           |
| Sn-SnS                                               | 30                                | 15               | 0                                 | NA                                            |
| SnS                                                  | 30                                | 60               | 0                                 | NA                                            |
| SnS-Sn <sub>2</sub> S <sub>3</sub> -SnS <sub>2</sub> | 30                                | 120              | 0                                 | NA                                            |
| Sn <sub>2</sub> S <sub>3</sub> -SnS <sub>2</sub>     | 20                                | 200              | 0                                 | NA                                            |
| SnS <sub>2</sub>                                     | 20                                | 200              | 0                                 | Annealing at 300 °C under Ar flow             |
| SnS-Sn <sub>2</sub> S <sub>3</sub>                   | 20                                | 200              | 0                                 | Reduction at 300 °C under H <sub>2</sub> flow |
| SnS-SnS <sub>2</sub>                                 | 20                                | 200              | 0                                 | Reduction at 350 °C under H <sub>2</sub> flow |
| SnSe                                                 | 30                                | 0                | 60                                | NA                                            |
| SnSe <sub>2</sub>                                    | 30                                | 0                | 120                               | NA                                            |
| SnSe-SnSe <sub>2</sub>                               | 30                                | 0                | 120                               | Reduction at 450 °C under H <sub>2</sub> flow |
| SnS <sub>0.9</sub> Se <sub>0.1</sub>                 | 30                                | 30               | 3                                 | NA                                            |
| SnS <sub>0.7</sub> Se <sub>0.3</sub>                 | 30                                | 30               | 5                                 | NA                                            |
| SnS <sub>0.6</sub> Se <sub>0.4</sub>                 | 30                                | 30               | 10                                | NA                                            |
| SnS <sub>0.4</sub> Se <sub>0.6</sub>                 | 30                                | 30               | 15                                | NA                                            |
| SnS <sub>0.3</sub> Se <sub>0.7</sub>                 | 30                                | 23               | 17                                | NA                                            |
| SnS <sub>0.1</sub> Se <sub>0.9</sub>                 | 30                                | 30               | 30                                | NA                                            |
| SnSSe                                                | 20                                | 200              | 50                                | Annealing at 300 °C under Ar flow             |

**Fig. S1** A plot of the S composition ( $x$ ) of  $\text{SnS}_x\text{Se}_{1-x}$  NCs versus that of  $[\text{H}_2\text{S}]_x[\text{DMS}]_{1-x}$ .

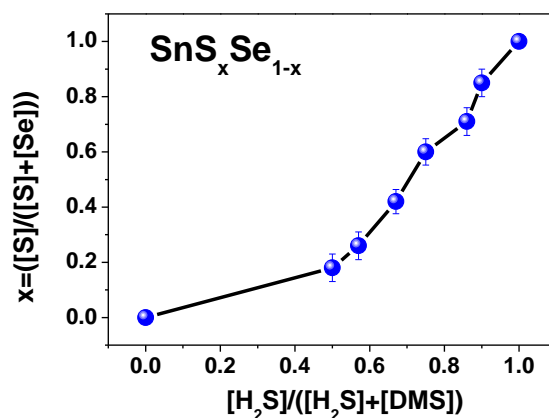

**Fig. S2** (a) HRTEM image of  $\text{SnSe-SnSe}_2$  hybrid. (b) The  $d$ -spacing of the (001) planes of  $\text{SnSe}_2$  was clearly identified as 6.2 Å, from the intensity line profiles over the selected area at the edge of the nanosheets, which is consistent with those of the bulk. (c) The adjacent O-phase  $\text{SnSe}$  and H-phase  $\text{SnSe}_2$  domains were identified by the corresponding FFT images (insets). The (111) planes of  $\text{SnSe}$  ( $d_{111} = 3.0$  Å) and the (001) planes of  $\text{SnSe}_2$  ( $d_{001} = 6.2$  Å) were confirmed.

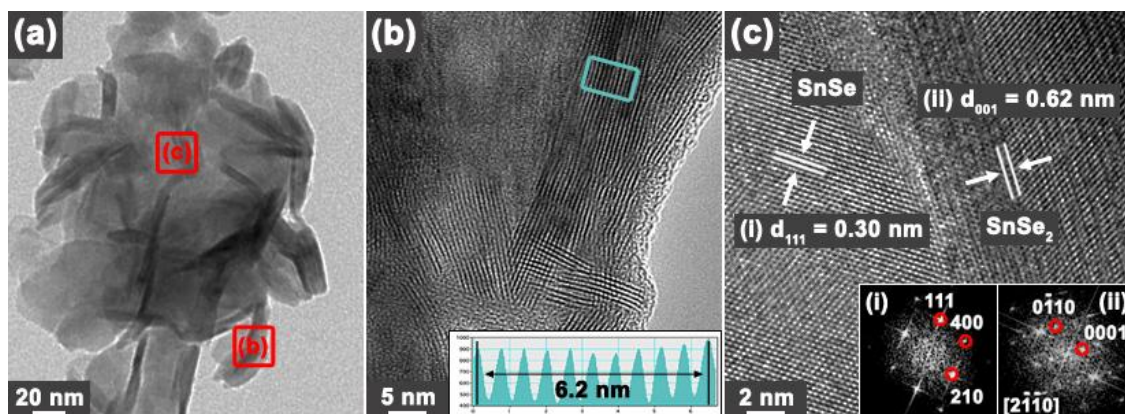

**Fig. S3** HRTEM and FFT images of (a) O-phase  $\text{SnS}_{0.4}\text{Se}_{0.6}$  and (b) H-phase  $\text{SnSSe}$ . The  $d$ -spacing of the (111) planes of  $\text{SnS}_{0.4}\text{Se}_{0.6}$  NCs was 2.9 Å, corresponding to that of the bulk; c.f.  $d_{111}=2.8$  Å (SnS) and 3.0 Å (SnSe). The EDX data (Sn L, S K, and Se L shells) confirmed an atomic ratio of Sn:S:Se = 1:0.4:0.6. Line-scanned data showed that Sn, S, and Se in ratios of 1:0.4:0.6 distributed homogeneously along the cross-section of the NCs. The  $d$ -spacing of the (001) planes of  $\text{SnSSe}$  nanosheets was clearly identified as 6.0 Å, from the intensity line profiles, which is consistent with those of the bulk; c.f.  $d_{001}=5.9$  Å ( $\text{SnS}_2$ ) and 6.2 Å ( $\text{SnSe}_2$ ). EDX data showed their corresponding compositions Sn:S:Se=1:1:1.

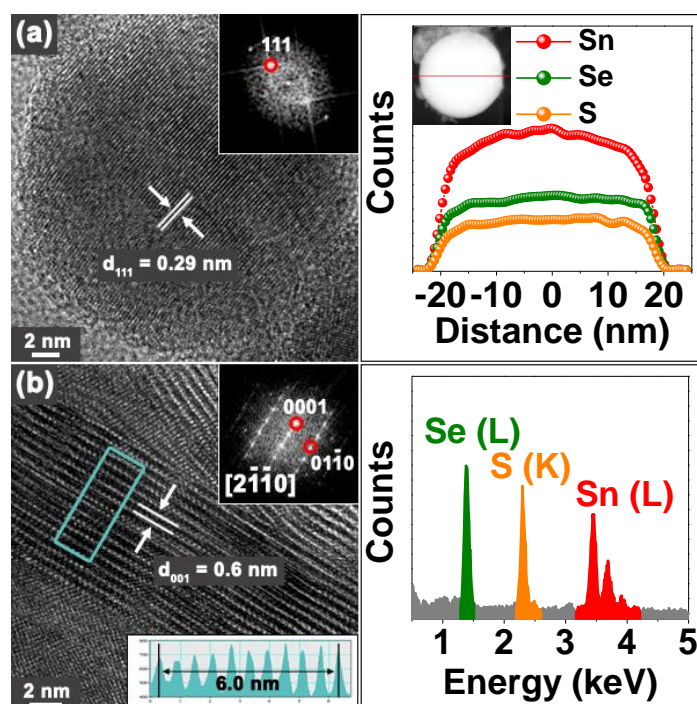

**Fig. S4** UV-visible-NIR absorption spectra of (a) SnS,  $\text{SnS}_{0.4}\text{Se}_{0.6}$ , and SnSe; (b)  $\text{SnS}_2$ , SnSSe, and  $\text{SnSe}_2$ ; (c)  $\text{Sn}_2\text{S}_3$ - $\text{SnS}_2$  NCs. The spectra were used to estimate the indirect and direct band gaps by performing Kubelka-Munk transformations [Reference: A. Hagfeldt, and M. Grätzel, *Chem. Rev.* 1995, **95**, 49-68.]. A plot of  $[ah\nu]^2$  and  $[ah\nu]^{1/2}$

(where  $\alpha$  is the absorption coefficient) versus photon energy yielded the direct and indirect band gaps, respectively. The value is listed in Table S1.

For SnS, SnS<sub>0.4</sub>Se<sub>0.6</sub>, and SnSe, the optical band gaps were estimated to be 1.24 eV (1000 nm), 1.06 eV (1170 nm), and 0.96 eV (1290 nm), from the onset of absorption band, which is consistent with the indirect band gap. These values also agree with those determined in previous studies on NCs;  $E_g$  (SnS) = 1.1 eV (diameter = 3 nm), 1.27 eV (diameter = 280 nm);  $E_g$  (SnSe) = 0.9 eV (diameter = 9 nm), 1.15 eV (diameter = 4.5 nm), 1.12 eV (nanowires) [References are 1, 10, 13, 20, and 21 of the text].

The optical band gaps were 2.26 eV (549 nm), 1.70 eV (726 nm), and 1.14 eV (1088 nm), for SnS<sub>2</sub>, SnSSe, and SnSe<sub>2</sub>, respectively, from the onset of absorption band. The values of SnS<sub>2</sub> and SnSSe are close to the direct band gap, while that of SnSe<sub>2</sub> is rather close to the indirect band gap. The band gap of SnS<sub>2</sub> NCs agrees with the value of previous works; 2.25~2.32 eV (diameter = ~20 nm) [Reference: Y. C. Zhang, J. Li, M. Zhang and D. D. Dionysiou, *Environ. Sci. Technol.* 2011, **45**, 9324-9331.], and 2.23 eV (single sheet) [Reference: Y. Sun, H. Chen, S. Gao, Z. Sun, Q. Liu, Q. Liu, F. Lei, T. Yao, J. He, S. Wei and Y. Xie, *Angew. Chem. Int. Ed.* 2012, **51**, 8727-8731.].

The optical band gap (direct) of Sn<sub>2</sub>S<sub>3</sub> was estimated to be 1.24 eV (1000 nm) from the onset of the spectrum of Sn<sub>2</sub>S<sub>3</sub>-SnS<sub>2</sub>, since the band gap of SnS<sub>2</sub> is 2.3 eV. Previous works showed that Sn<sub>2</sub>S<sub>3</sub> is a mixed Sn (II)-Sn (IV) valence compound semiconductor, and the band gap depends strongly on the crystalline structure and stoichiometry, over the wide range of 0.95~2.2 eV;  $E_g$  = 0.95 eV [Reference: U. V. Alpen, J. Penner and E. Gmelin, *Mat. Res. Bull.*, 1975, **10**, 175-180.]; 1.16 eV [Reference: S. Lopez, S.

Granados and A. Ortiz, *Semicond. Sci. Technol.*, 1996, **11**, 433-436.]; 1.9-2.2 eV (indirect) [Reference: H. Ben Haj Salah, H. Bouzouita and B. Benzig, *Thin Solid Films* 2005, **480**, 439-442.]; 2.0 eV (direct) [Reference: M. Khadraoui, N. Benramdane, C. Mathieu, A. Bouzidi, R. Milou, Z. Kebbab, K. Sahraoui and R. Desfeux. *Solid Stat. Commun.* 2010, **150**, 297-300.]; 1.2 and 1.57 eV (direct) [Reference: A. J. Ragina, K. V. Murail, K. C. Preetha, K. Deepa and T. L. Remadevi, *J. Mater. Sci.: Mater. Electron.*, 2012, **23**, 2264-2271.].

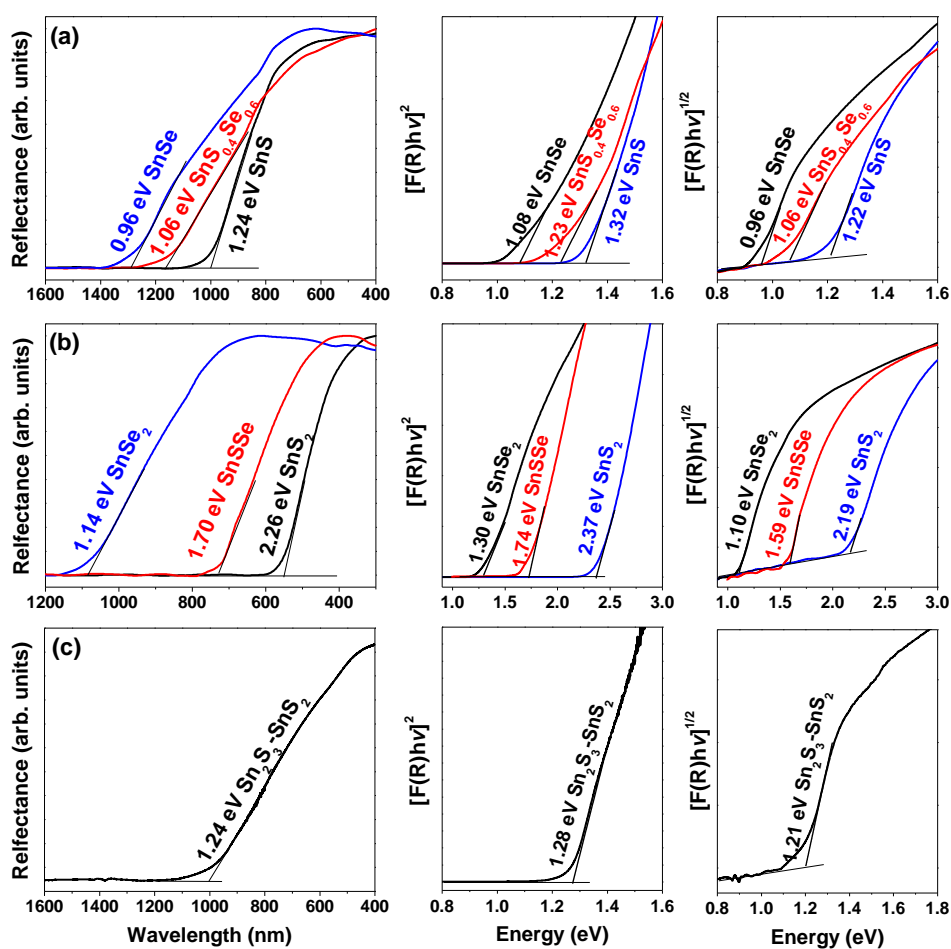

**Table S2.** Optical band gap (from the onset of absorption spectrum), and direct/indirect band gaps, estimated using Kubelka-Munk transformations.

|                                                  | $E_g$ from the onset (eV) | $E_g$ (direct) | $E_g$ (indirect) |
|--------------------------------------------------|---------------------------|----------------|------------------|
| SnS                                              | 1.24                      | 1.32           | 1.22             |
| SnS <sub>0.4</sub> Se <sub>0.6</sub>             | 1.06                      | 1.23           | 1.06             |
| SnSe                                             | 0.96                      | 1.08           | 0.96             |
| SnS <sub>2</sub>                                 | 2.26                      | 2.37           | 2.19             |
| SnSSe                                            | 1.70                      | 1.74           | 1.59             |
| SnSe <sub>2</sub>                                | 1.14                      | 1.30           | 1.10             |
| Sn <sub>2</sub> S <sub>3</sub> -SnS <sub>2</sub> | 1.24                      | 1.28           | 1.21             |

**Fig. S5** The CV data were measured using an electrochemical analyzer (IVIUM CompactStat) using gold (area ca. 0.02 cm<sup>2</sup>) disks as the working electrode, a Pt-wire auxiliary electrode and an Ag/0.01 M AgNO<sub>3</sub> reference electrode (BAS Inc., 0.1 M tetrabutylammonium hexafluorophosphate (TBAPF<sub>6</sub>)/ acetonitrile electrolyte).

(a) CV curves (vs. Ag/Ag<sup>+</sup> reference electrode) of SnS, SnS<sub>0.4</sub>Se<sub>0.6</sub>, and SnSe, recorded at a scan rate of 20 mVs<sup>-1</sup>, showing strong oxidation peaks ( $E_{Ox}$ ) and weak reduction peaks ( $E_{Red}$ ). The valence band (VB) and conduction band (CB) energies of NCs were calculated from the  $E_{Ox}$  and  $E_{Red}$  values, assuming the energy level of ferrocene/ferrocenium (Fc/Fc<sup>+</sup>) to be -4.8 eV below the vacuum level. The formal potential of Fc/Fc<sup>+</sup> was measured to be 0.085 V against an Ag/Ag<sup>+</sup> reference electrode. Therefore,  $E_{VB}$  ( $E_{HOMO}$ ) =  $-(E_{Ox}+4.715)$  eV;  $E_{CB}$  ( $E_{LUMO}$ ) =  $-(E_{Red}+4.715)$  eV, where the onset potential values are relative to the Ag/Ag<sup>+</sup> reference electrode. From the onset value of  $E_{Ox}$  peak (~0.4 V), the position of the valence band (VB) edge was estimated to be  $E_{VB} = -5.2$  eV from the vacuum level. The weak reduction peaks ( $E_{Red}$ ) appeared at nearly the same voltage (onset at -0.9 V), suggesting  $E_{CB} = -3.8$  eV from vacuum level. Taken the  $E_{VB}$  (which is more reliable due to the well-defined peak shape) and the

optical band gap (from the UV-Vis-NIR absorption spectrum),  $E_{CB} = -4.0, -4.1, \text{ and } -4.2$  eV were obtained. Table S2 summarizes the results.

(b) CV curves of SnS<sub>2</sub>, SnSSe, and SnSe<sub>2</sub> NCs at a scan rate of 20 mVs<sup>-1</sup> show the oxidation peaks with onsets of 1.6, 1.1, and 0.7 V, respectively. From this onset value, the positions of the VBs were estimated to be  $E_{VB} = -6.3, -5.8, \text{ and } -5.4$  eV, respectively. Taken these  $E_{VB}$  values and the optical band gap (from the UV-Vis-NIR absorption spectrum),  $E_{CB} = -4.0, -4.1, \text{ and } 4.3$  eV were obtained. The  $E_{CB}$  values were coherently obtained using the reduction peaks. The  $E_{VB}$  and  $E_{CB}$  values are close to the work function ( $\Phi$ ) and electron affinity ( $\chi$ ) of the bulk:  $\Phi = 6.3$  eV and  $\chi = 4.2$  eV for SnS<sub>2</sub>;  $\Phi = 5.35$  eV and  $\chi = 4.4$  eV for SnSe<sub>2</sub> [Reference: R. H. Williams, R. B. Murray, D. W. Govan, J. M. Thomas and E. L. Evans, *J. Phys. C: Solid State Phys.*, 1973, **6**, 3631-3642].

(c) CV curves of Sn<sub>2</sub>S<sub>3</sub>-SnS<sub>2</sub> and SnS-Sn<sub>2</sub>S<sub>3</sub> NCs at a scan rate of 20 mVs<sup>-1</sup>. The Sn<sub>2</sub>S<sub>3</sub>-SnS<sub>2</sub> show two oxidation peaks with onsets of 1.0 and 1.6 V, which can be assigned to Sn<sub>2</sub>S<sub>3</sub> and SnS<sub>2</sub>, respectively. The SnS-Sn<sub>2</sub>S<sub>3</sub> also show two oxidation peaks with onsets of 0.4 and 1.0 V, which can be assigned to SnS and Sn<sub>2</sub>S<sub>3</sub>, respectively. There are two reduction peaks with onsets of -0.3 and -0.9 V, which can be assigned to Sn<sub>2</sub>S<sub>3</sub> and SnS, respectively. From the same onset value of  $E_{Ox}$  peaks (1.0 V), the VB position of Sn<sub>2</sub>S<sub>3</sub> was estimated to be  $E_{VB} = -5.7$  eV. Using this  $E_{VB}$  value and the optical band gap (1.24 eV) from the UV-Vis-NIR absorption spectrum),  $E_{CB} = -4.5$  eV were obtained. The  $E_{VB}$  value is consistent with the value estimated using  $E_{Red} = -0.3$  V.

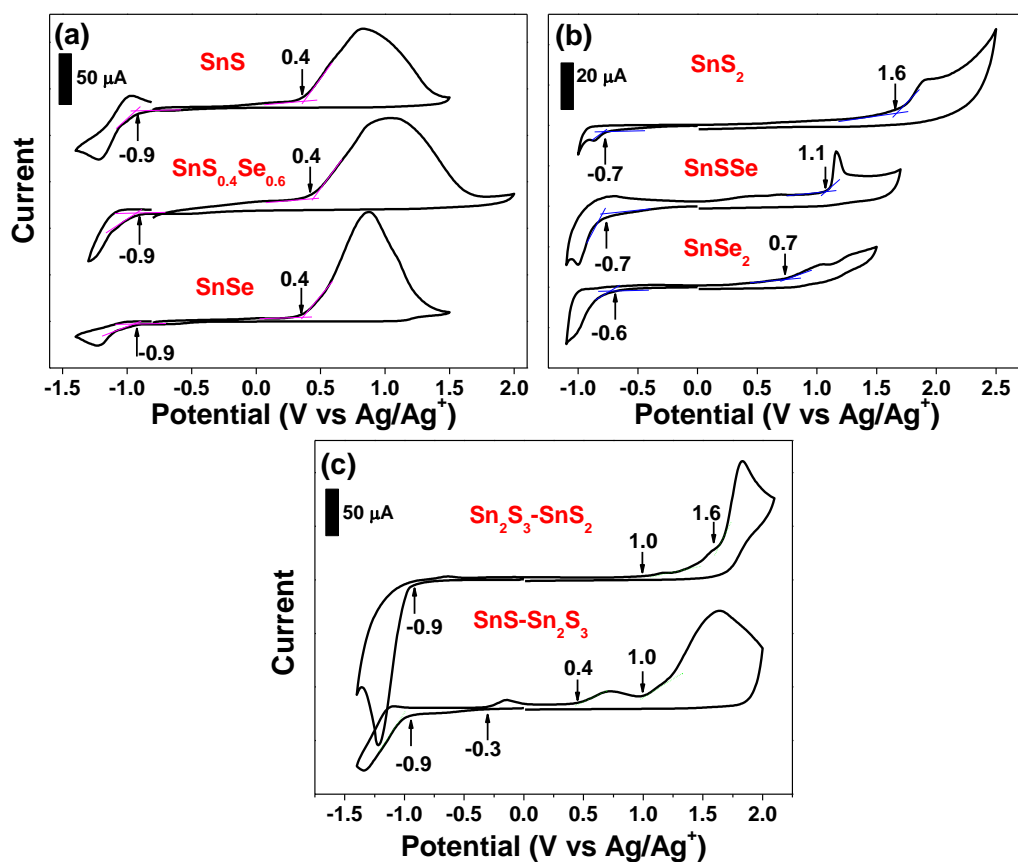

**Table S3.** Position of conduction and valence bands (in eV) versus vacuum level, which were estimated from the CV and UV-Vis-NIR absorption spectroscopy data.

|                                      | $E_{Ox}$<br>(V) | $E_{Red}$<br>(V) | $E_{Ox}-E_{Red}$<br>(V) | $E_{VB}$<br>(eV) <sup>a</sup> | $E_{CB}$<br>(eV) <sup>b</sup> | $E_g$<br>(eV) <sup>c</sup> | $E_{CB}$<br>(eV) <sup>d</sup> |
|--------------------------------------|-----------------|------------------|-------------------------|-------------------------------|-------------------------------|----------------------------|-------------------------------|
| SnS                                  | 0.4             | -0.9             | 1.3                     | <b>-5.1</b>                   | -3.8                          | 1.24                       | <b>-3.9</b>                   |
| SnS <sub>0.4</sub> Se <sub>0.6</sub> | 0.4             | -0.9             | 1.3                     | <b>-5.1</b>                   | -3.8                          | 1.06                       | <b>-4.0</b>                   |
| SnSe                                 | 0.4             | -0.9             | 1.3                     | <b>-5.1</b>                   | -3.8                          | 0.96                       | <b>-4.1</b>                   |
| SnS <sub>2</sub>                     | 1.6             | -0.7             | 2.3                     | <b>-6.3</b>                   | -4.0                          | 2.26                       | <b>-4.0</b>                   |
| SnSSe                                | 1.1             | -0.7             | 1.8                     | <b>-5.8</b>                   | -4.0                          | 1.70                       | <b>-4.1</b>                   |
| SnSe <sub>2</sub>                    | 0.7             | -0.6             | 1.3                     | <b>-5.4</b>                   | -4.1                          | 1.14                       | <b>-4.3</b>                   |
| Sn <sub>2</sub> S <sub>3</sub>       | 1.0             | -0.3             | 1.3                     | <b>-5.7</b>                   | -4.4                          | 1.24                       | <b>-4.5</b>                   |

<sup>a</sup> $E_{VB} = -(E_{Ox} + 4.715)$  eV; <sup>b</sup> $E_{CB} = -(E_{Red} + 4.715)$  eV; <sup>c</sup>Optical band gap, which is estimated from the UV-visible-NIR absorption spectrum; <sup>d</sup> $E_{CB}$  (eV) =  $E_{VB} + E_g$  (optical band gap)
